# Supplementary material for: CO2-triggered fine tuning of electrical conductivity via tug-of-war between ions
Source: Royal Society of Chemistry journal article supplement (doi:10.1039/c8nj02642d), 2018-01-01
Supplement: c8nj02642d1.pdf [file c8nj02642d1.pdf]

## Electronic Supplementary Information

CO<sub>2</sub>-triggered fine tune of electrical conductivity  
via tug-of-war between ions

Kosuke Kuroda\*, Yumiko Shimada, Kenji Takahashi

Correspondence to: [kkuoda@staff.kanazawa-u.ac.jp](mailto:kkuoda@staff.kanazawa-u.ac.jp)

## Materials and Methods

### Materials

3-Bromopropylamine hydrobromide and phthalaldehydic acid were purchased from Tokyo Chemical Industry Co., Ltd. and used as received. 1-Methylimidazole was purchased from Acros Organics and used as received. Methanol, ethyl acetate, tetrahydrofuran (THF), dichloromethane, acetic acid, sodium hydroxide was purchased from Kanto Chemical Co., Inc. and used as received. Amberlite IRN 78A and aluminum oxide was purchased from Sigma-Aldrich Co., Llc. and used as received.

### Synthesis of [C<sub>3</sub>NH<sub>2</sub>mim][*o*-aldBzCOO]

1-Methylimidazole (10.9 g, 133 mmol) was dissolved in 80 mL THF, and then 3-bromopropylamine hydrobromide (30.6 g, 140 mmol) was added to the solution under argon atmosphere. The mixture was refluxed at 90 °C for 5 h. After removing solvent, the solid was recrystallized in methanol/ethyl acetate mixture several times and dried under reduced pressure. The bromide anion was converted to hydroxide anion by stirring the bromide salt aqueous solution with Amberlite IRN 78A. After filtration, resulting liquid was neutralized by phthalaldehydic acid and then dried *in vacuo*. The resulting solution diluted with dichloromethane solution was passed through a column filled with aluminium oxide to remove excess amount of phthalaldehydic acid. The resulting solution was dried *in vacuo*. After drying, [C<sub>3</sub>NH<sub>2</sub>mim][*o*-aldBzCOO] was obtained as the ZI form.

$^1\text{H}$  NMR (400 MHz; DMSO- $d_6$ ; Me $_4$ Si)  $\delta$  = 9.62 (s, 1H, NCHN), 8.86 (s, 1H, N=CHC), 7.90 and 7.69 (t,  $J$  = 1.6 Hz, 2H, NCHCHN), 7.65-7.13 (m, 4H, protons of aromatic ring), 4.19 (t,  $J$  = 6.2 Hz, 2H, NCH $_2$ CH $_2$ CH $_2$ N=CH), 3.81 (s, 3H, NCH $_3$ ), 3.41 (t,  $J$  = 5.7 Hz, 2H, NCH $_2$ CH $_2$ CH $_2$ N=CH), 2.26-2.06 (m, 2H, NCH $_2$ CH $_2$ CH $_2$ N=CH).  $^{13}\text{C}$  NMR (100 MHz; chloroform- $d$ ; Me $_4$ Si)  $\delta$  = 170.22, 138.29, 134.33, 129.69, 128.89, 127.36, 126.36, 124.22, 122.75, 56.75, 49.10, 46.87, 36.09, 30.39. Elemental analysis: [C $_3$ NH $_2$ mim][*o*-aldBzCOO]·2.2H $_2$ O (Found: C, 58.0; H, 6.6; N, 13.2. Calc. for C $_{15}$ H $_{21.4}$ N $_3$ O $_{4.2}$ : C, 58.0; H, 6.9; N, 13.5%).

### **Structural shift of [C $_3$ NH $_2$ mim][*o*-aldBzCOO]**

[C $_3$ NH $_2$ mim][*o*-aldBzCOO] (1.0 wt%) was added to ultrapure water. The pH of the solution was changed with 33 wt% NaOH solution and 25–100 wt% acetic acid solutions. The ratio of the IL form was confirmed by  $^1\text{H}$  NMR. N $_2$  and CO $_2$  gas was saturated by water before passing the sample solutions to prevent evaporation of water of the samples; we confirmed that the volume of the sample solutions did not change before and after long-time gas bubbling.

### **Measurement of electrical conductivity of [C $_3$ NH $_2$ mim][*o*-aldBzCOO] solution**

An electrical conductivity meter (LAQUA DS-72, Horiba Ltd.) was used for the measurement of electrical conductivity of the aqueous solution of [C $_3$ NH $_2$ mim][*o*-aldBzCOO]. The measurement was carried out after the 1.0 wt% solutions were bubbled

with N<sub>2</sub> or CO<sub>2</sub> until the electrical conductivity did not shift. N<sub>2</sub> and CO<sub>2</sub> gas was saturated by water before passing the sample solutions to prevent evaporation of water of the samples. The partial pressure of CO<sub>2</sub> was controlled using a controlling system (Multi-GAS 3000, Taitec corporation), by mixing with air.

**Observation of emission from light-emitting diode (LED) incorporating a [C<sub>3</sub>NH<sub>2</sub>mim][*o*-aldBzCOO] solution as a variable resistor**

The electronic circuit was prepared with a LED (HK-LED 5H(R), Asahi Electric CO. Ltd.), an alternating-current source (GW instek APS-7050, Texio Technology Corporation), and an ammeter (MT-4510, Mother tool Co. Ltd.). The 1.0 wt% [C<sub>3</sub>NH<sub>2</sub>mim][*o*-aldBzCOO] aqueous solutions (3 mL) were bubbled with 0.1 kPa of CO<sub>2</sub> for 20 sec. After LED was electrified (3.5 V, 45 Hz), the current value was measured and a picture was taken immediately. The same procedure was successively carried out with 1 and 101 kPa of CO<sub>2</sub>. After that, the same procedure was conducted with N<sub>2</sub> for 16h. When the emission was controlled by exhaled breath, bubbling the breath was conducted for 3 min.

# Supporting Figures

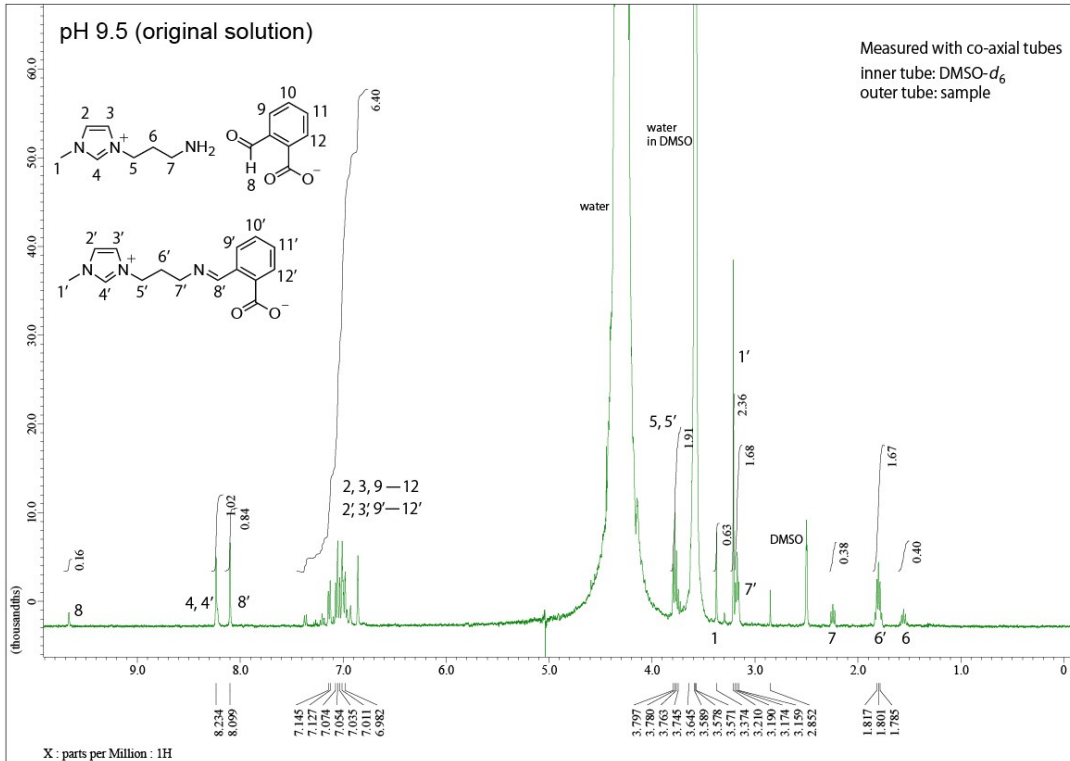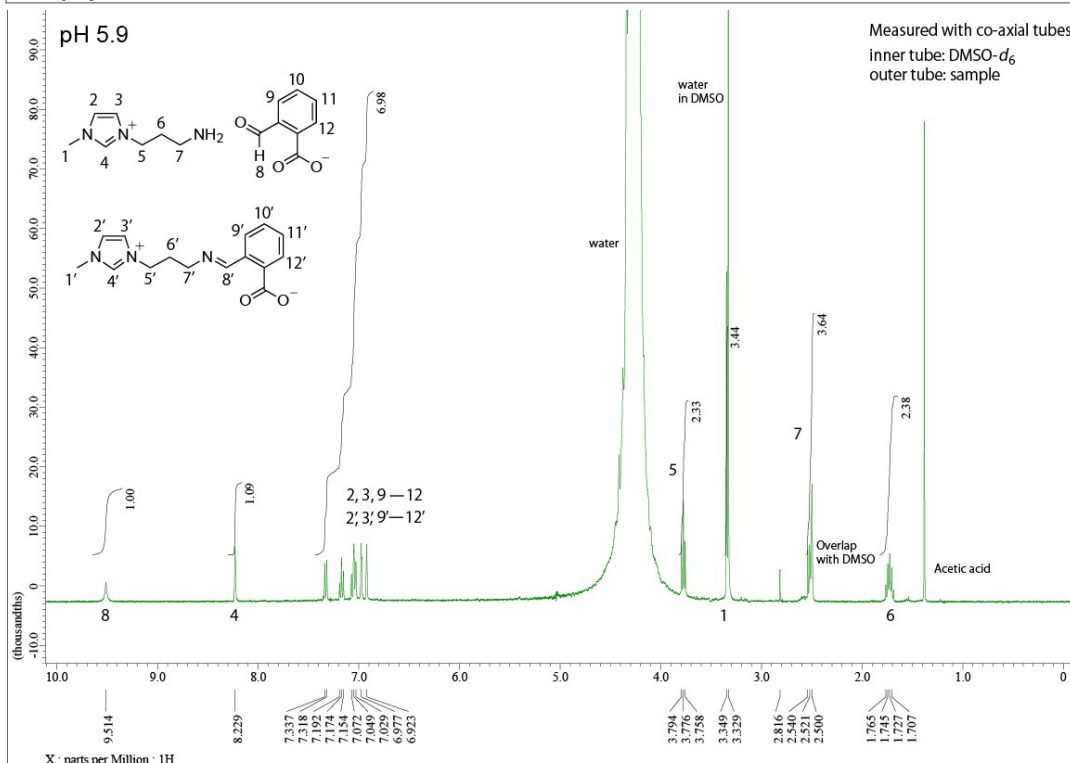

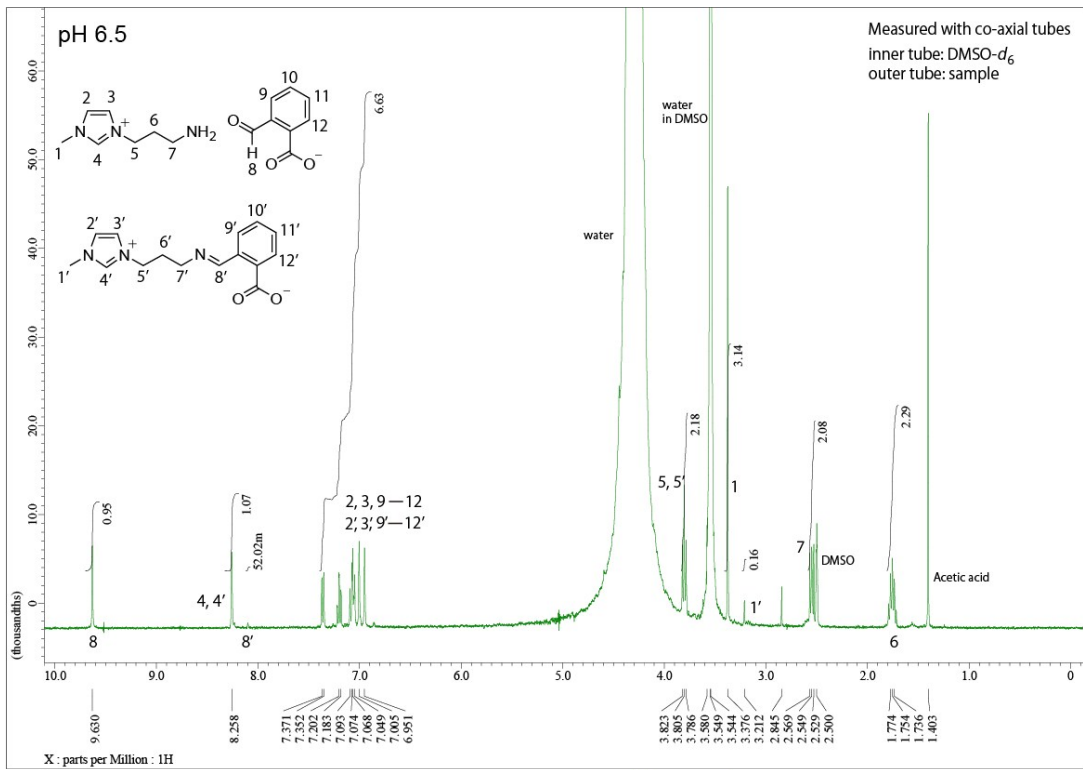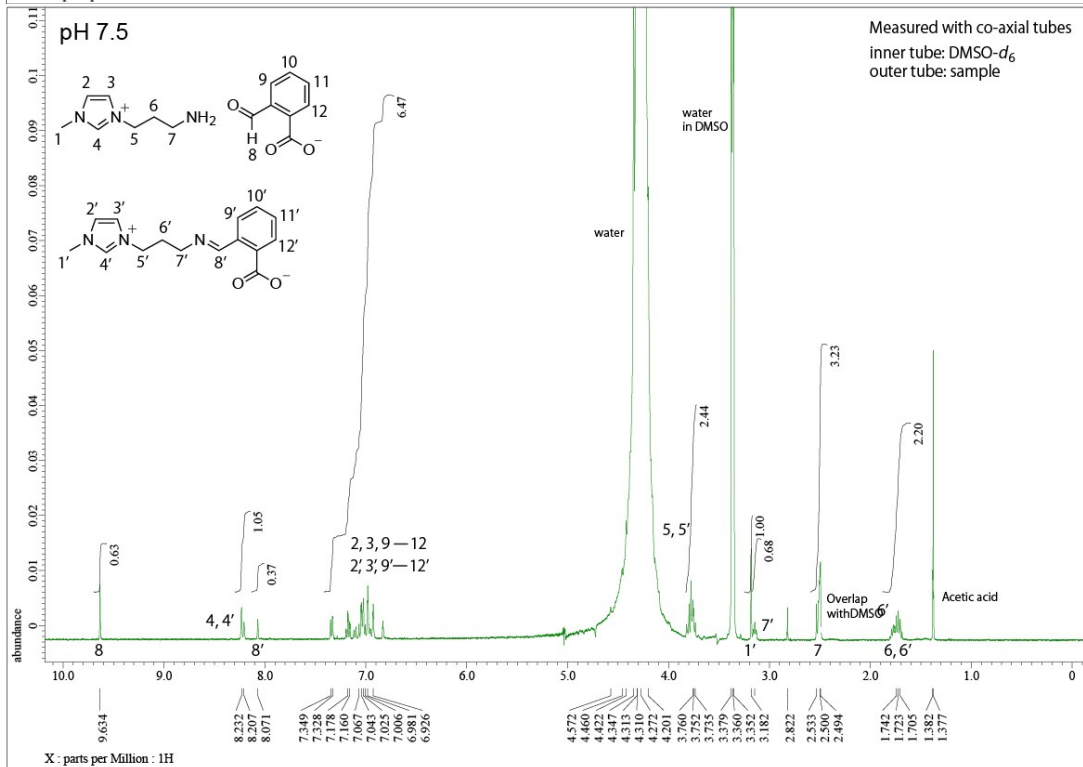

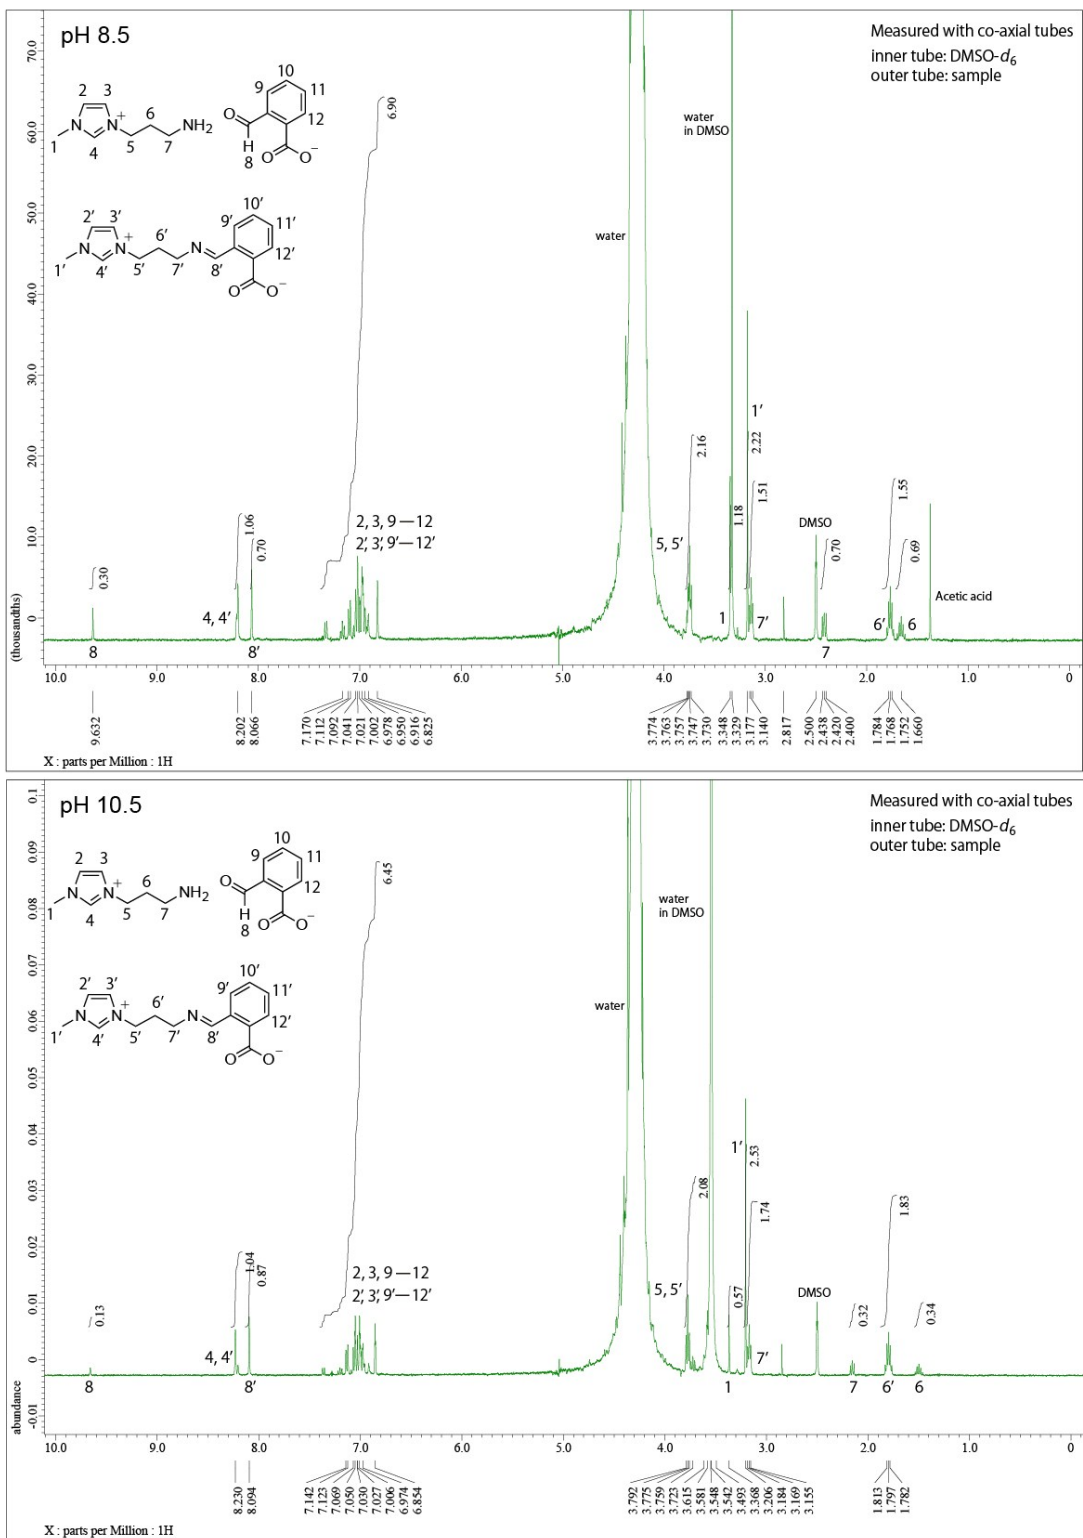

**Fig. S1.**  $^1\text{H}$  NMR spectra of 1 wt%  $[\text{C}_3\text{NH}_2\text{mim}][o\text{-aldBzCOO}]$  aqueous solution before and after changing pH by acid/base.

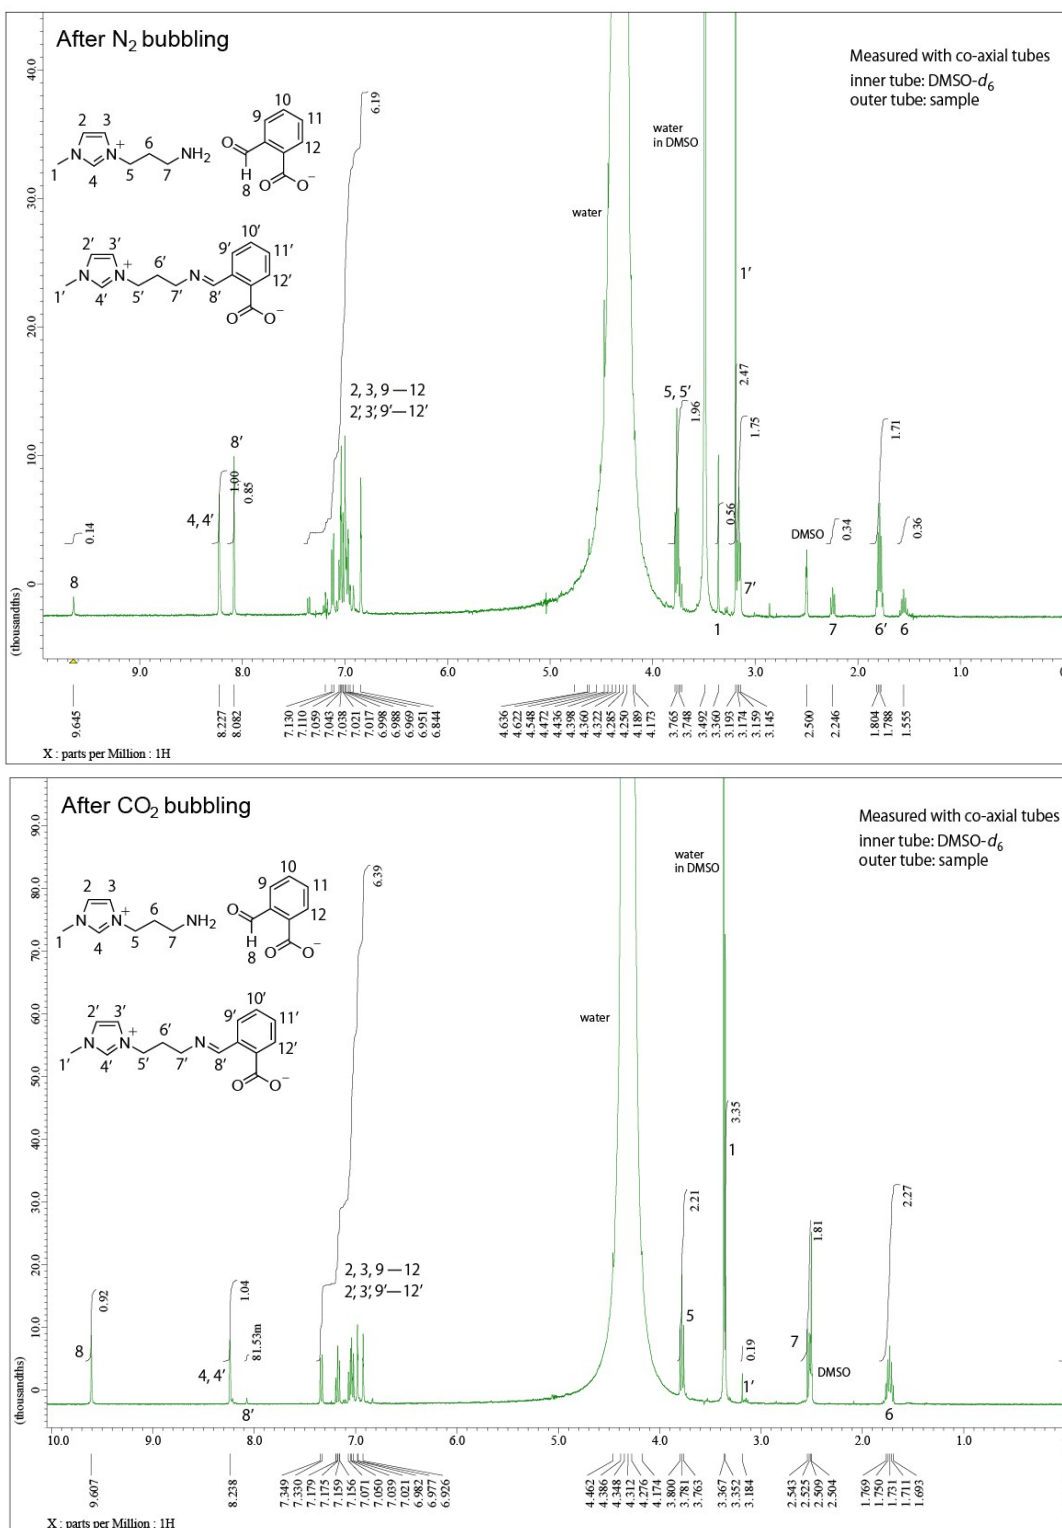

**Fig. S2.** <sup>1</sup>H NMR spectra of 1 wt% [C<sub>3</sub>NH<sub>2</sub>mim][*o*-aldBzCOO] aqueous solution after bubbling with (top) N<sub>2</sub> and (bottom) CO<sub>2</sub>.



We subjected  $[\text{C}_{3\text{NH}_2}\text{mim}][o\text{-aldBzCOO}]$  solution to mass spectrometry before  $\text{CO}_2$  bubbling (Fig. S3a, b). Two small and large peaks were observed and attributed to the cation of the IL form ( $m/z=140$ ) and ZI form ( $m/z=272$ ) in positive mode because  $[\text{C}_{3\text{NH}_2}\text{mim}][o\text{-aldBzCOO}]$  is a mixture of IL- and ZI form. ZIs are generally observed in mass spectra as proton-adducted form in positive mode because ZIs have single positive and negative charges and thus they are neutral in charge. Two large and small peaks were observed and attributed to the anion of the IL form ( $m/z=149$ ) and ZI form ( $m/z=270$ , proton-abstracted form) in negative mode.

While the same peaks ( $m/z=140$  and  $272$  in positive mode,  $m/z=149$  and  $270$  in negative mode) were found after  $\text{CO}_2$  bubbling (Supplementary Fig. S3c, d), but the peak height was different: the peak of IL form was higher than that of ZI form. This result clearly shows the exact structures of IL- and ZI forms and they shifted by bubbling with  $\text{CO}_2$ .

Some amines and ILs have ability to capture  $\text{CO}_2$  via covalent bond. Then we have subjected the 1 wt%  $[\text{C}_{3\text{NH}_2}\text{mim}][o\text{-aldBzCOO}]$  solution to mass spectrometry after  $\text{CO}_2$  bubbling (Fig. S3c). If the cation reacts with  $\text{CO}_2$ , the peak at 184 in  $m/z$  appears. However, no peak was observed at 184 and it shows the cation does not react with  $\text{CO}_2$ . This strongly supports that  $\text{CO}_2$  does not react with  $[\text{C}_{3\text{NH}_2}\text{mim}][o\text{-aldBzCOO}]$  and consequently  $\text{CO}_2$  works simply as an acid ( $\text{H}_2\text{CO}_3$ ) in the solution.

(a)

Positive mode  
Before CO<sub>2</sub> bubbling

[ Mass Spectrum ]  
Data : FAB-LR-2017-198 Date : 15-Feb-2018 08:57  
Instrument : MStation  
Sample : ZI  
Note : No.210 Matrix:YOKUDEL  
Inlet : Direct Ion Mode : FAB+  
Spectrum Type : Normal Ion [MF-Linear]  
RT : 5.20 min Scan# : 27  
BP : m/z 272 Int. : 693.65 (7273471)  
Output m/z range : 50 to 601 Cut Level : 0.00 %

IL form

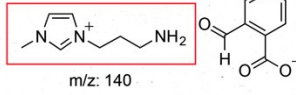

ZI form

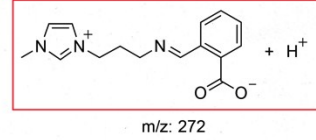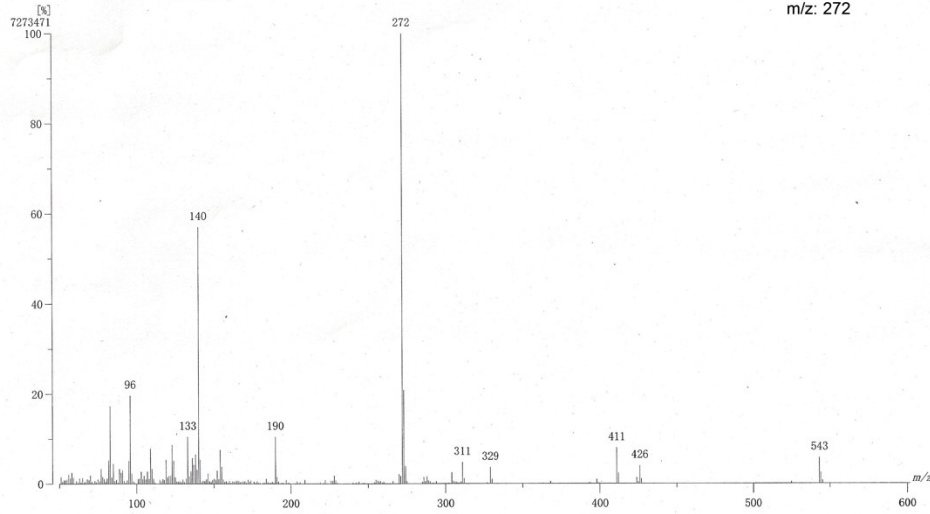

(b)

Negative mode  
Before CO<sub>2</sub> bubbling

[ Mass Spectrum ]  
Data : FAB-LR-2017-212 Date : 16-Feb-2018 11:29  
Instrument : MStation  
Sample : ZI  
Note : No.210 Matrix:Glycerol  
Inlet : Direct Ion Mode : FAB-  
Spectrum Type : Normal Ion [MF-Linear]  
RT : 6.40 min Scan# : 33  
BP : m/z 183 Int. : 144.50 (1515232)  
Output m/z range : 50 to 583 Cut Level : 0.00 %

IL form

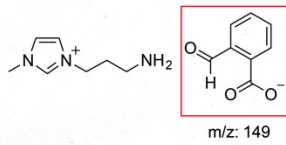

ZI form

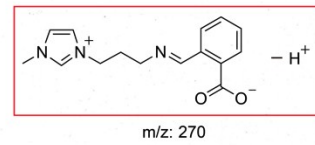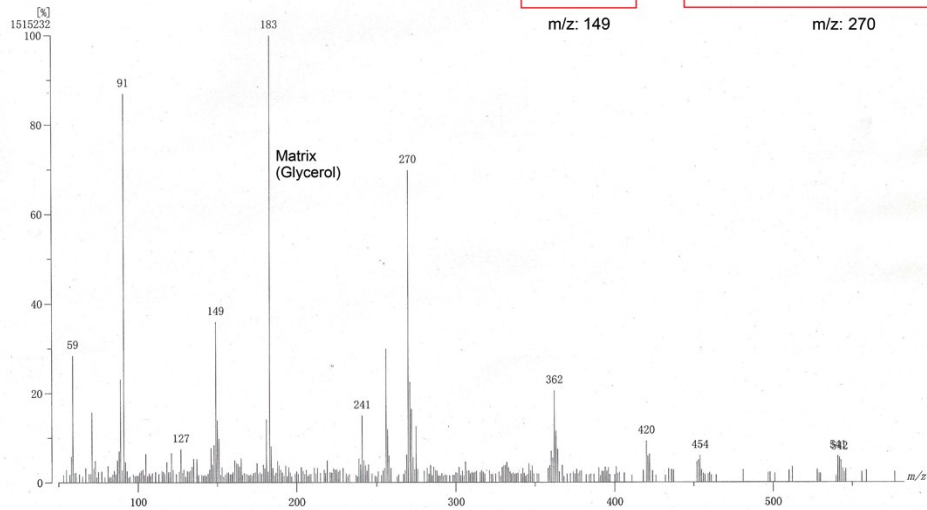

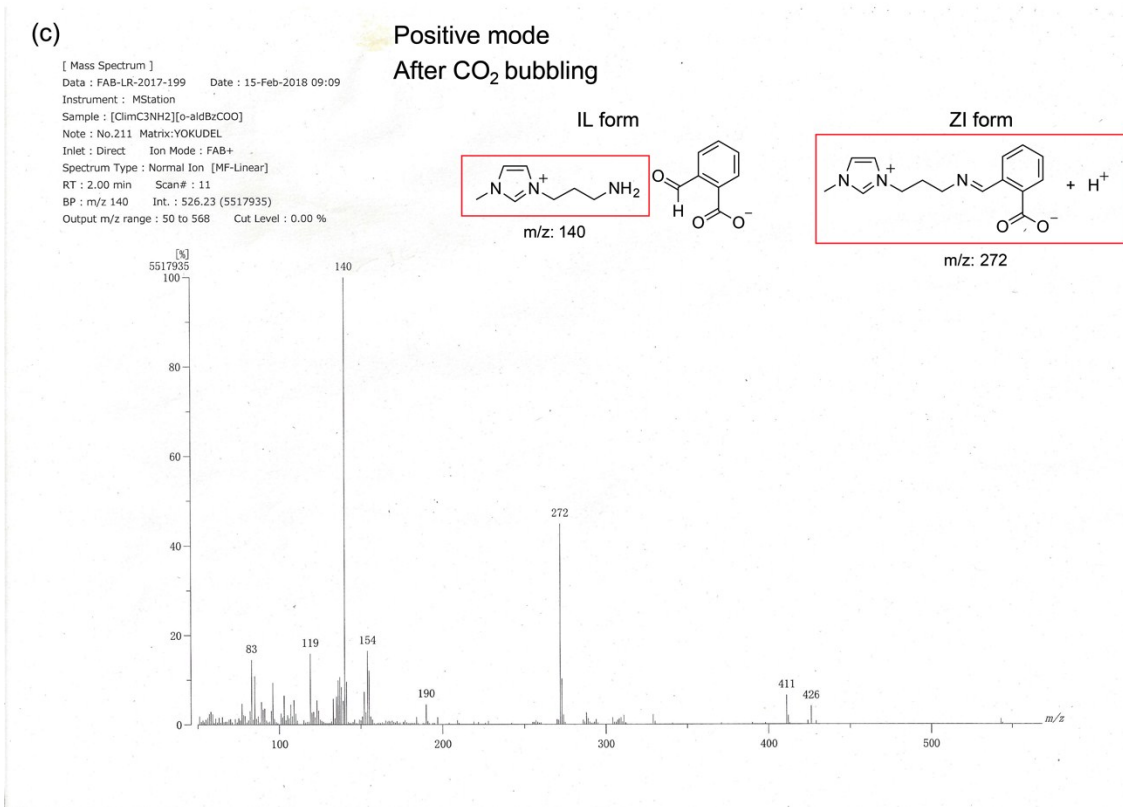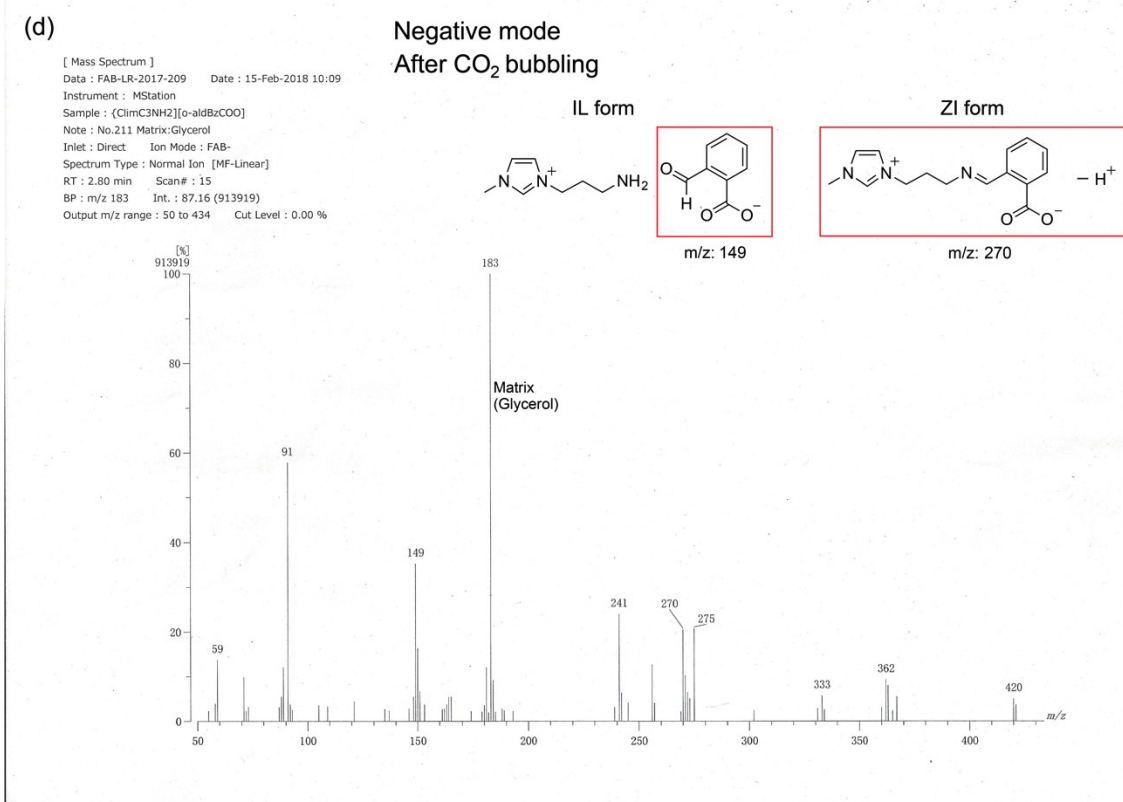

**Fig. S3.** Mass spectra (a, c: positive mode, and b, d: negative mode) of 1 wt% [C<sub>3</sub>NH<sub>2</sub>mim][o-aldBzCOO] aqueous solution (a, b) before and (c, d) after CO<sub>2</sub> bubbling.

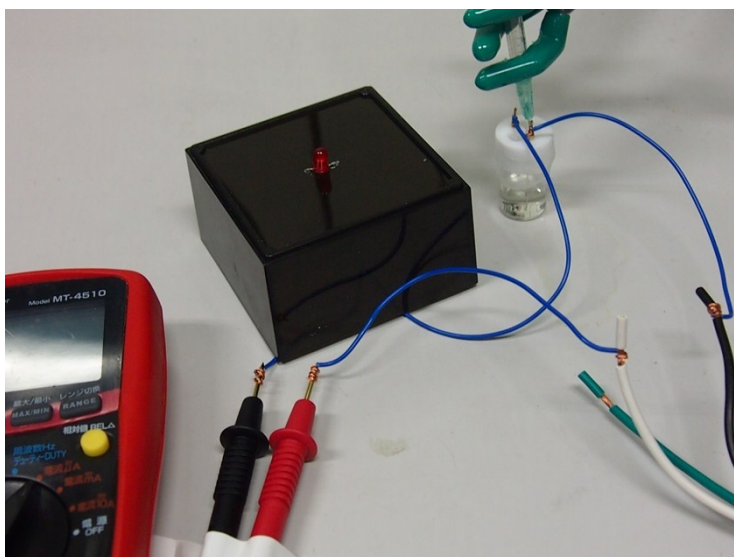

**Fig. S4.** A picture of the system for the emission experiment. The top right vial contains a  $[\text{C}_3\text{NH}_2\text{mim}][o\text{-aldBzCOO}]$  solution.  $\text{CO}_2$  and  $\text{N}_2$  flowed from gas cylinders to the solution through the top right syringe. Nothing is inside the center box except for conducting wires (the box is used just for fixing the LED).
